# Supplementary material
Source: publisher site journal article supplement (https://www.spandidos-publications.com/4054/downloadSupplementary)

Figure S1. Flow cytometric analysis of oral cancer cell lines after *OIP5* knockdown. The cell cycle histograms detected by flow cytometric analysis of (A) Ca9-22 and (B) CAL 27 cells transfected with siRNAs for *OIP5* or control siRNAs. *OIP5*, opa interacting protein 5.

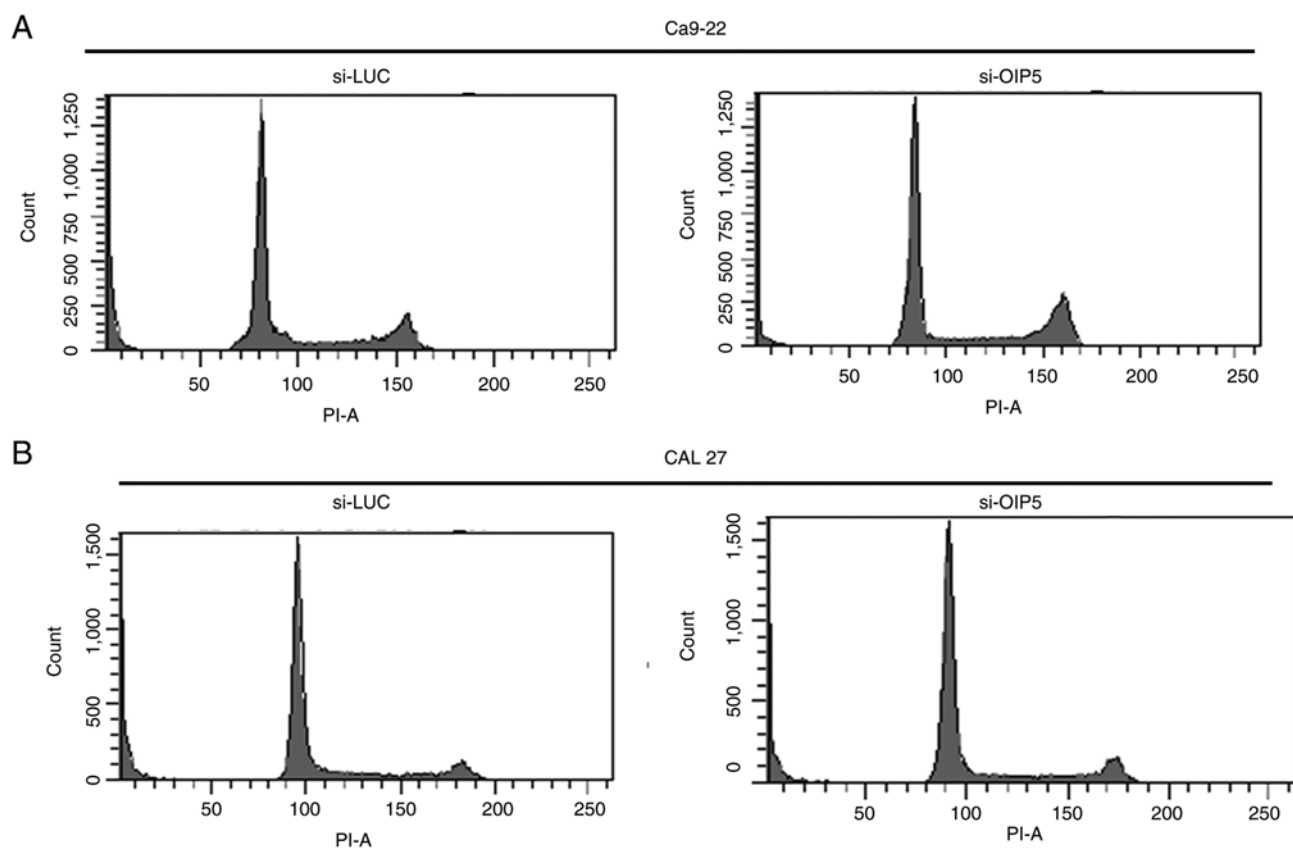

Supplement: Supplementary file 1 [file downloadSupplementary]
